# Supplementary material for: Folate-targeting and bovine serum albumin-gated mesoporous silica nanoparticles as a redox-responsive carrier for epirubicin release
Source: Royal Society of Chemistry journal article supplement (doi:10.1039/c8nj05476b), 2019-01-01
Supplement: c8nj05476b1.pdf [file c8nj05476b1.pdf]

## SUPPORTING INFORMATION

### **Folate targeting and bovine serum albumin gated mesoporous silica nanoparticles as a redox-responsive carrier for epirubicin release**

Yuan Zhang,<sup>a</sup> Yang Xing,<sup>a</sup> Ming Xian,<sup>b</sup> Shaomin Shuang<sup>a</sup>, Chuan Dong<sup>\*a</sup>

<sup>a</sup> Institute of Environmental Science, and School of Chemistry and Chemical Engineering, Shanxi University,  
Taiyuan 030006, China. E-mail: dc@sxu.edu.cn.

<sup>b</sup> *Department of chemistry, Washington State University, Pullman, WA, 99164, USA.*

\*Corresponding author. Tel.: +86-351-7018613

Table.S1 DLS and LC data of MSN and MSN-FA

| polymer | Drug loading Content (%) | Drug loading efficiency (%) |
|---------|--------------------------|-----------------------------|
| MSN     | N/A                      | N/A                         |
| MSN-FA  | 15.0                     | 60.0                        |

Table.S2 Main structural characteristics of MSN and MSN-FA

|                                  | MSN     | MSN-FA | EPI/MSN-FA |
|----------------------------------|---------|--------|------------|
| $S_{BET}$ ( $m^2 \cdot g^{-1}$ ) | 1103.02 | 400.68 | 107.86     |
| $V_p$ ( $cm^3 \cdot g^{-1}$ )    | 1.22    | 0.59   | 0.22       |
| $D_p$ (nm)                       | 2.70    | 2.60   | 2.40       |

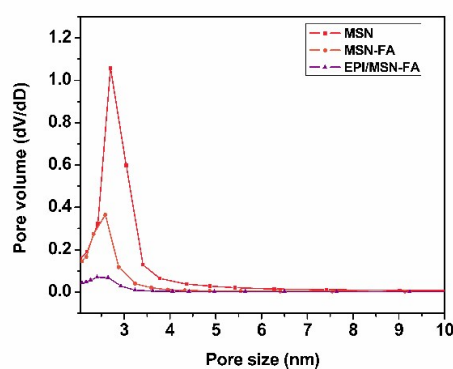

Fig. S1 pore size distribution of MSN, MSN-FA and EPI/MSN-FA

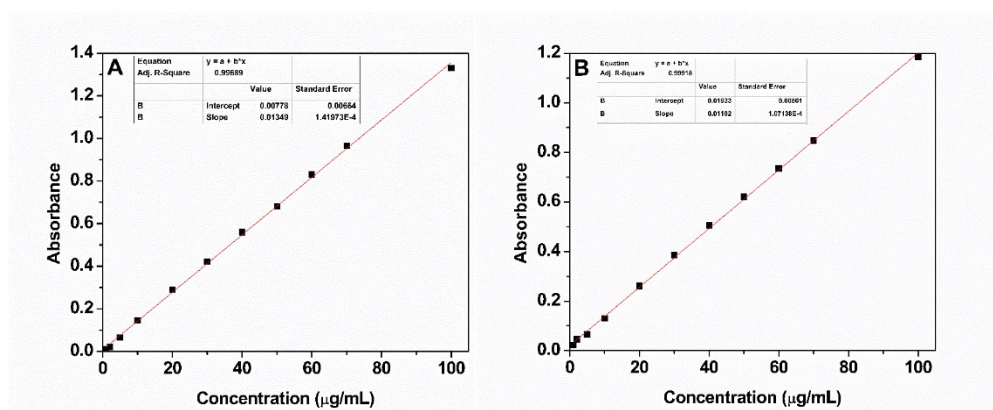Fig. S2 EPI's standard curves of different pH. (A) pH 7.4,  $Y = 0.01349x + 0.00778$ ,  $R^2 = 0.999$  and (B) pH=5.3,

$$Y = 0.011x + 0.019, R^2 = 0.999.$$

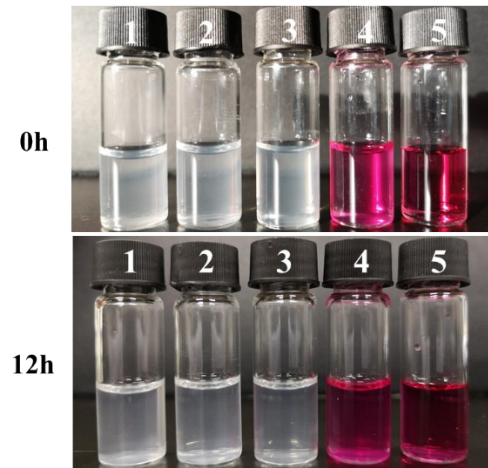

Fig. S3 Images of MSN-FA dispersed in different media (From 1 to 4: distilled water, PBS, SBF, DMEM) with 1 mg/mL MSN-FA, 5: pure DMEM without MSN-FA for 0 and 12 hours.

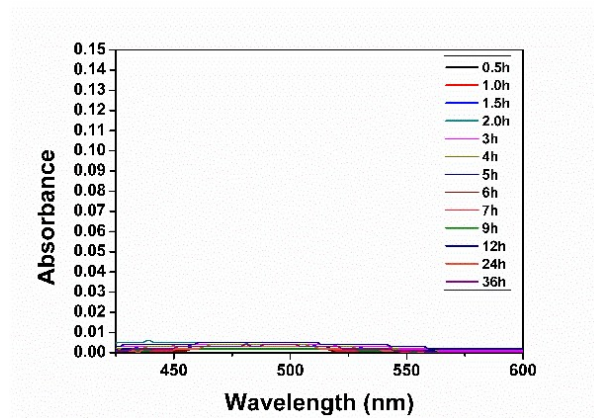

Fig. S4 The UV absorbance about drug release at different time periods from EPI/sSiO<sub>2</sub>-FA.

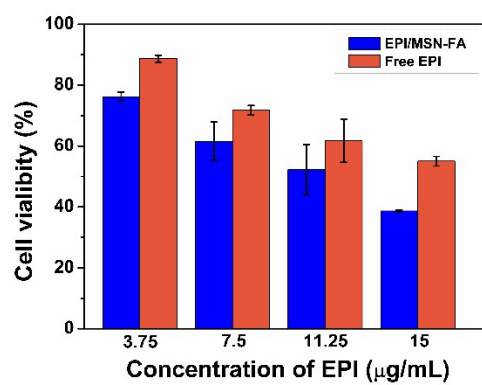

Fig. S5 Viability of HepG2 cells cultured with EPI/MSN-FA in comparison with that of free EPI at the same EPI dose for 24h.
